# Supplementary material
Source: publisher figshare collection journal article supplement (https://karger.figshare.com/ndownloader/files/27061946)
Supplement: Supplementary file 1 [file 27061946]

Supplementary Table 3 Sensitive analysis of lymph node status

| Study omitted | HR (95%CI) |
| --- | --- |
| Dong et al 2019 | 4.10 [2.98, 5.65] |
| Genç et al 2018 | 3.83 [2.74, 5.34] |
| Harimoto et al 2019 | 4.05 [2.95, 5.57] |
| Lopez-Aguiar 2019 | 4.29 [2.80, 6.59] |
| Mao et al 2020 | 4.10 [3.00, 5.60] |
| Zou et al 2020 | 3.69 [2.66, 5.10] |
| Combined | 3.99 [2.94, 5.41] |
